# Supplementary material
Source: Springer Nature journal article supplement (https://www.springermedizin.de/resource/supplementary/12891_2010_980_MOESM2_ESM.pdf/9506846)

# Low Back Recording Grid Setup

Left side Center Right side

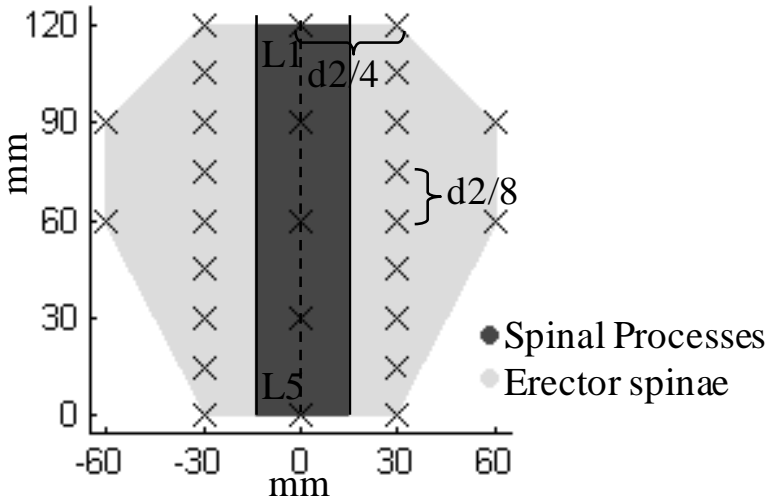

Supplement: MOESM2 [file 9506846]
